# Supplementary material
Source: PubMed Central journal article supplement (PMC9645299)
Supplement: NIHMS1843393-supplement-1.pdf [file NIHMS1843393-supplement-1.pdf]

## Supplementary Information: Suppl. Figs. 1, 2, 3 and 4

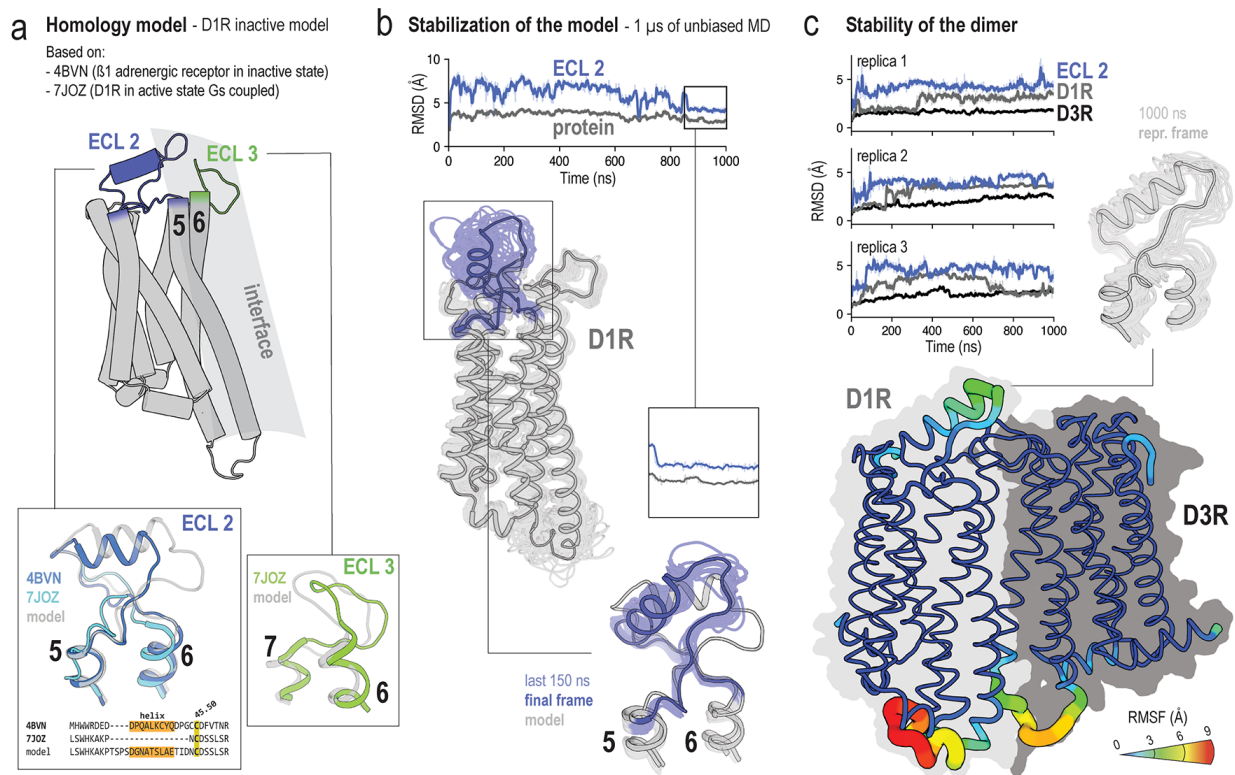

**Suppl. Figure 1. Modeling of the D<sub>1</sub>R in the D<sub>1</sub>R-D<sub>3</sub>R heteromer.** **a.** The inactive model of D<sub>1</sub>R was constructed from the structures of inactive  $\beta_1$  adrenergic receptor (61% and 42% of sequence similarity and identity, respectively) and active D<sub>1</sub>R. ECLs 2 (blue) and 3 (green) are important to remark because they might participate in the TM 5/6 interface. The bottom panel (right) shows ECL 3 in the model (gray) and in the structure of active D<sub>1</sub>R (green). However, ECL 2 is not solved in any of the known structures of D<sub>1</sub>R and was modeled using the structure of the  $\beta_1$  adrenergic receptor as template. The bottom panel (left) shows ECL 2 in the model (gray), in the  $\beta_1$  adrenergic receptor (dark blue), and the solved part in D<sub>1</sub>R (light blue). The sequence alignment between D<sub>1</sub>R (7JOZ only shows the amino acids solved in the structure) and  $\beta_1$  adrenergic receptor is also shown. **b.** The stability of this computational model of D<sub>1</sub>R was tested in 1  $\mu$ s unbiased MD simulation. RMSD plots show that, as expected, the modeled ECL 2 is more flexible than the TM domain. However, ECL 2 seems stabilized in the last 150 ns of simulation. Evolution of the structures of D<sub>1</sub>R (gray) and ECL 2 (blue) along the MD simulation is shown in the middle panel and a detailed view of the structures of ECL 2 during the last 150 ns is shown in the bottom panel. **c.** A representative structure of the D<sub>1</sub>R obtained during the last 150 ns was respawned in three replicas of 1  $\mu$ s unbiased MD simulation of the D<sub>1</sub>R-D<sub>3</sub>R heteromer. RMSD values for D<sub>1</sub>R and D<sub>3</sub>R and for the ECL 2 are shown in the top panel. Average root-mean-square fluctuation (RMSF) of the D<sub>1</sub>R-D<sub>3</sub>R heteromer is shown in the bottom panel. RMSF accounts for the average fluctuation of the structure along the simulation. A close-up of the ECL 2 is shown for one of the replicas.

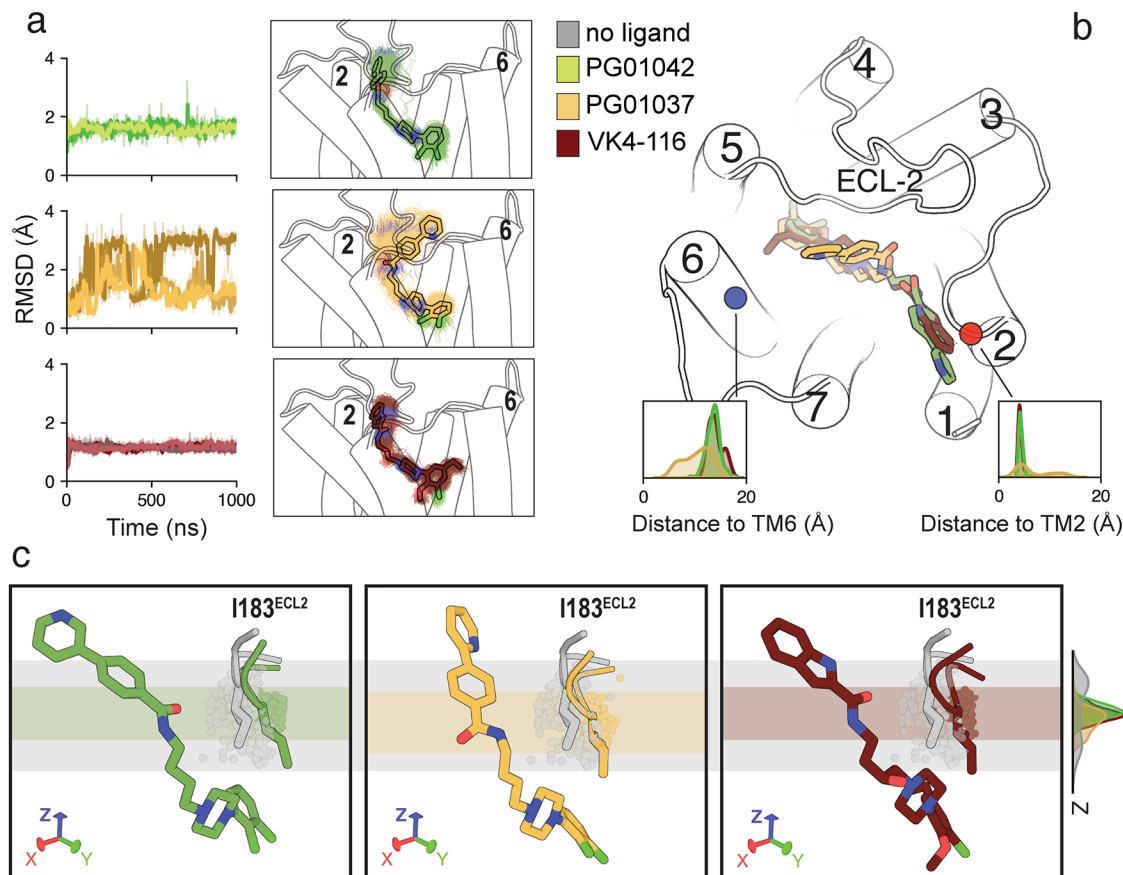

**Suppl. Figure 2. Molecular dynamic simulations of the D<sub>3</sub>R monomer bound to PG01042, PG01037, and VK4-116.** **a.** Rmsd of three replicas of 1  $\mu$ s unbiased MD simulations. Representative structures (solid sticks) and evolution (lines) of PG01042 (green), PG01037 (orange) and VK4-116 (red) in complex with D<sub>3</sub>R (white cylinders, only the initial structure is shown) during the MD simulations. **b.** Comparison of these representative structures in the initial structure of D<sub>3</sub>R. Distribution of the distances between the center of mass of the terminal ring in the second pharmacophore unit of these ligands and N352<sup>6.58</sup> in TM 6 (blue dot) and G93<sup>2.68</sup> in TM 2 (red dot). PG01042 and VK4-116 remained stable at the ECD near TM 2, whereas PG01037 favors its interaction with TM 6. **c.** Detailed view of I183 of D<sub>3</sub>R during MD simulations with no ligand bound (gray) and PG01042 (green), PG01037 (orange) and VK4-116 (red) bound to D<sub>3</sub>R. Distributions of the Z coordinate (see legend of Fig. 2) corresponding to the C <sub>$\alpha$</sub>  atom of I183<sup>ECL2</sup> during MD simulations. The range of the Z coordinate during the MD simulations are shown by the rectangles, color-coded according to the ligand bound. No significant differences in the position of I183<sup>ECL2</sup> between ligands are observed.

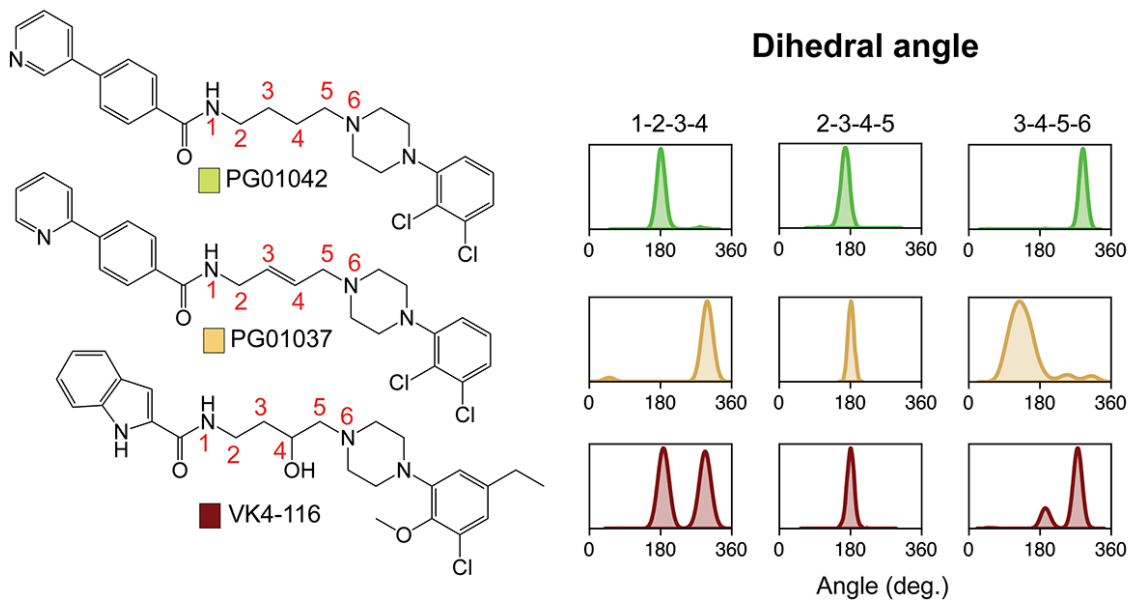

**Suppl. Figure 3. Distribution of dihedral angles of PG01042, PG01037, and VK4-116 in the simulations of their complexes with D<sub>3</sub>R.** The dihedral angles are calculated for the chain linking both pharmacophore units. Each plot accounts for the accumulated distribution of the three replicates. Atoms involved in the angles are referenced in red in the 2D structures.

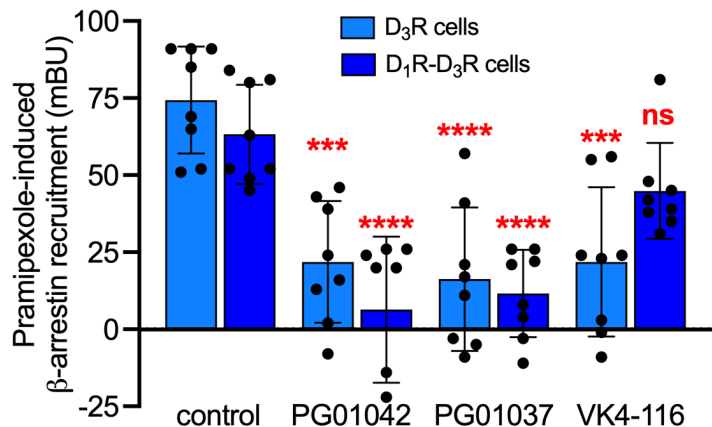

**Suppl. Figure 4. Differential effects of PG01042, PG01037, and VK4-116 on pramipexole-induced  $\beta$ -arrestin recruitment in HEK-293T cells transfected with D<sub>3</sub>R alone or with D<sub>1</sub>R.** Results from  $\beta$ -arrestin recruitment experiments in HEK-293T cells transfected with  $\beta$ -arrestin-1-Rluc cDNA (0.5  $\mu$ g), D<sub>3</sub>R-YFP cDNA (1  $\mu$ g cDNA) with or without D<sub>1</sub>R cDNA (1.5  $\mu$ g cDNA) (D<sub>1</sub>R-D<sub>3</sub>R cells and D<sub>3</sub>R cells, respectively). Cells are treated for 10 min with the D<sub>2</sub>-like receptor agonist pramipexole (30 nM) or the D<sub>3</sub>R ligands PG01042, PG01037 and VK4-116 (10 nM). Coelenterazine H (5  $\mu$ M) was added before pramipexole or the selective D<sub>3</sub>R ligands for 7 minutes and  $\beta$ -arrestin-1 recruitment was measured by BRET (see Material and Methods). Values are mean  $\pm$  S.D. (n = 8). \*\*\*, \*\*\*\* or ns: p < 0.001, p < 0.0001 or not significant (p > 0.05) versus corresponding D<sub>3</sub>R or D<sub>1</sub>R-D<sub>3</sub>R cells only treated with pramipexole (control) (one-way ANOVA followed by Dunnett's post hoc comparisons).
